# Supplementary material for: A Simple Method to Fabricate the Highly Sensitive SERS Substrate by Femtosecond Laser-Based 3D Printer
Source: MDPI journal article supplement (doi:10.3390/chemosensors11060340), 2023-06-08
Supplement: s1 [file s1]

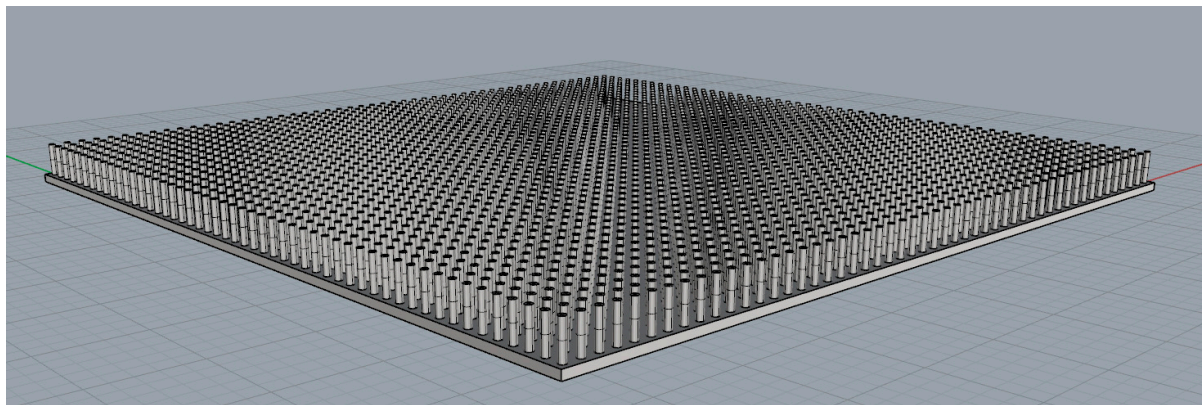

**Figure S1.** 3D design of single spot of 3D printed SERS nanostructure which is composed of  $25 \times 25$   $\mu\text{m}^2$  size and has 625 circular pillars in the area.

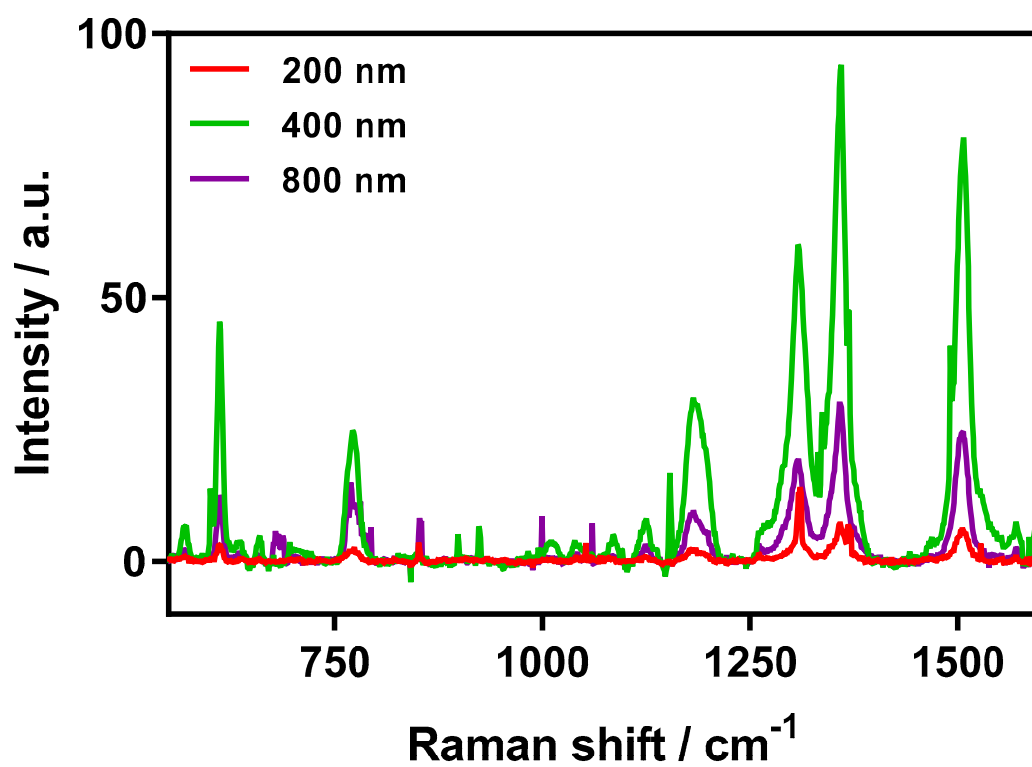

**Figure S2.** Magnified average SERS spectra of 3D printed SERS nanostructures that printed as 10000 mm/s.

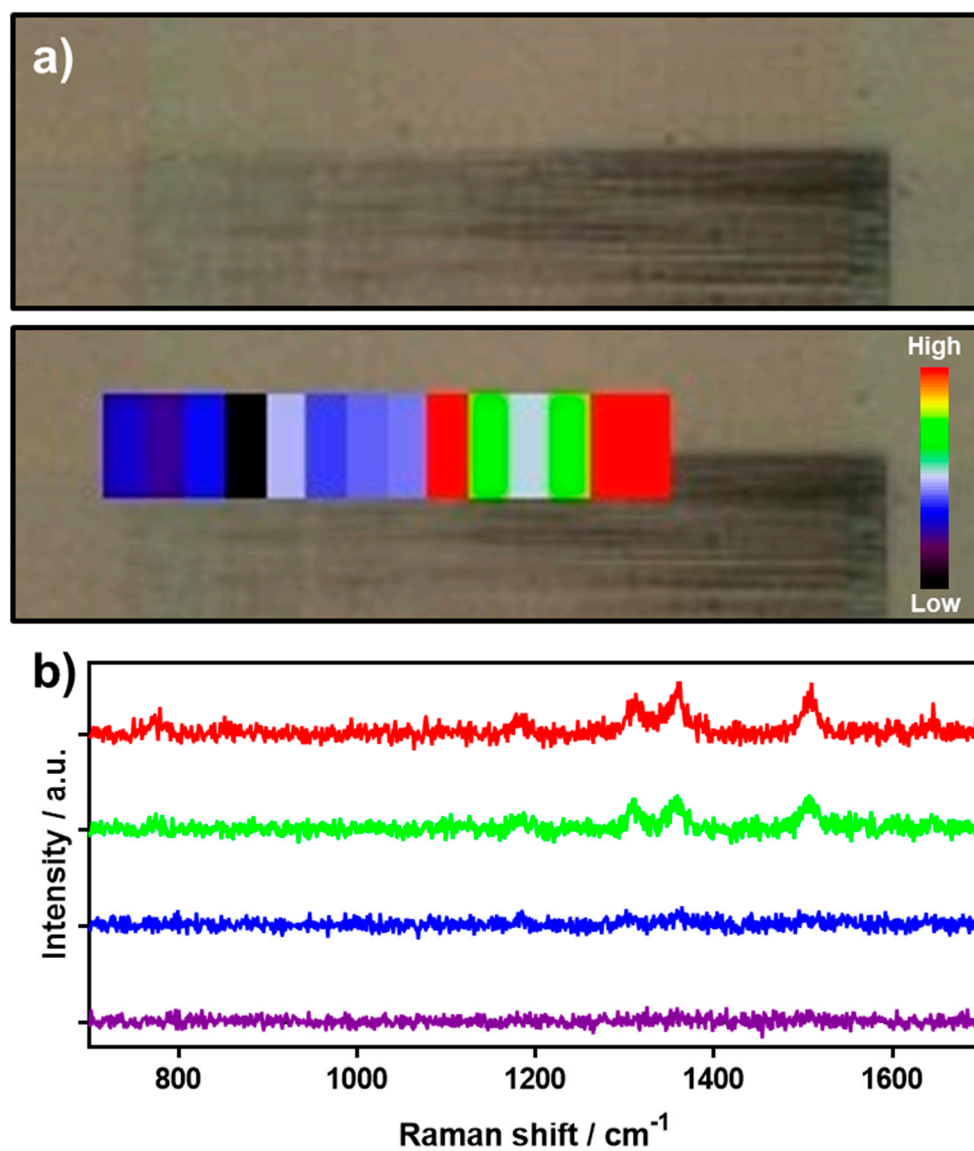

**Figure S3.** Gradient 3D printed SERS nanostructure fabrication *via* femtosecond laser printer. a) Microscopic and SERS mapping images of gradient printed nanostructure. b) SERS spectra of 1  $\mu\text{M}$  of CV treated nanostructures. From red to purple, the pillar radius gradually decreases.
